# Supplementary material
Source: PubMed Central journal article supplement (PMC6322011)

## **Online Data Supplement**

### **Seasonal and Regional Variations in COPD Exacerbation Rates in Adults without Cardiovascular Risk Factors**

Jennifer Y. So, MD, Huaqing Zhao, PhD, Helen Voelker, BA, Robert M. Reed, MD, Donald Sin, MD, Nathaniel Marchetti, MD, Gerard J. Criner, MD, COPD CRN investigators

Figure S1. CONSORT diagram of subjects included in the study.

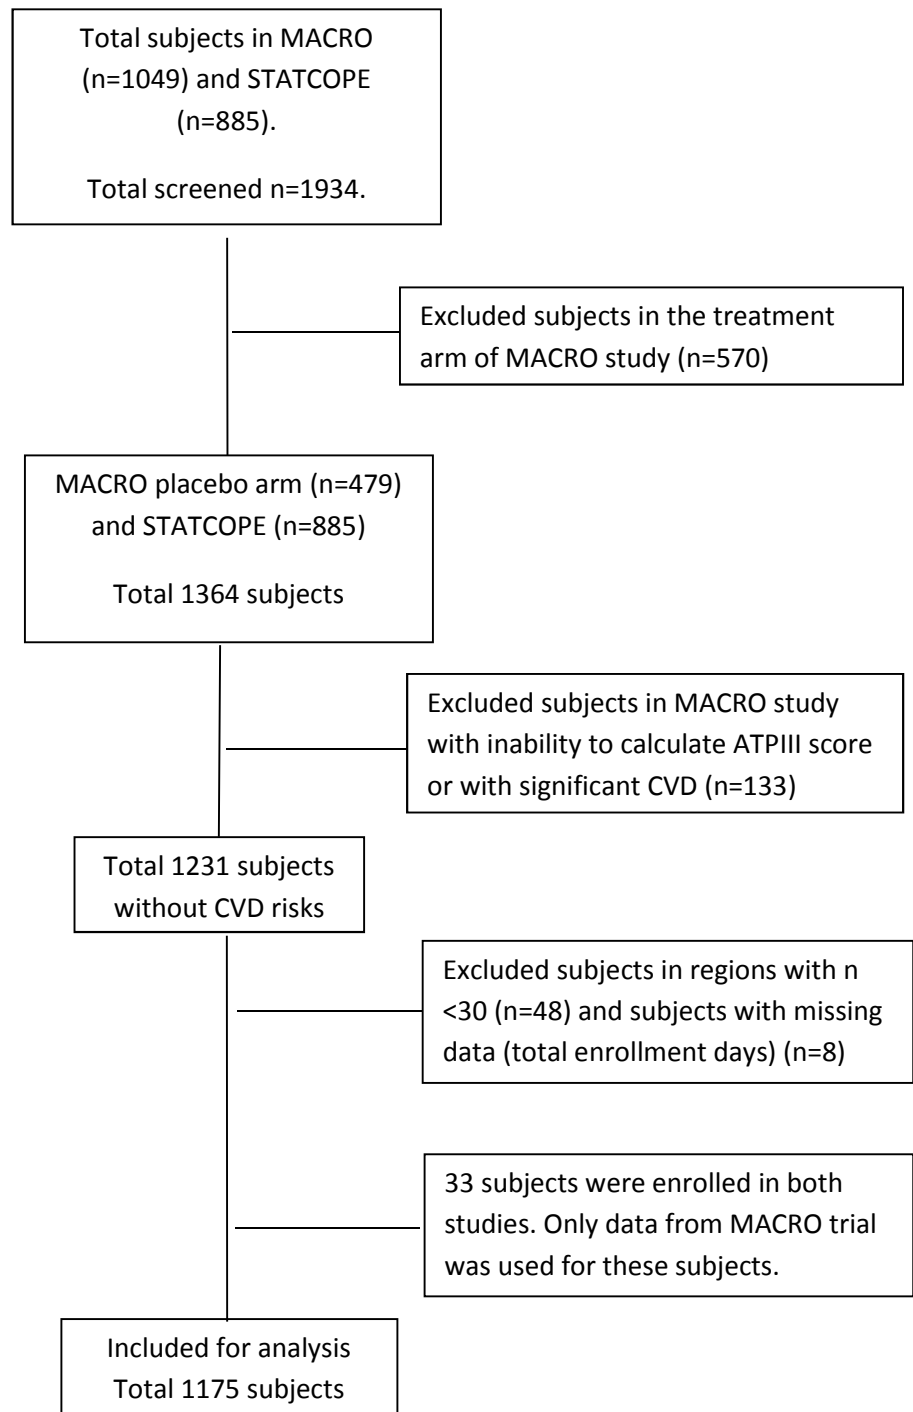

MACRO: Azithromycin for the Prevention of Exacerbations of COPD; STATCOPE: Simvastatin in the Prevention of COPD exacerbations; CVD: Cardiovascular Disease.

Figure S2. Rates ratio of exacerbations in each region in seasons compared to those in summer.

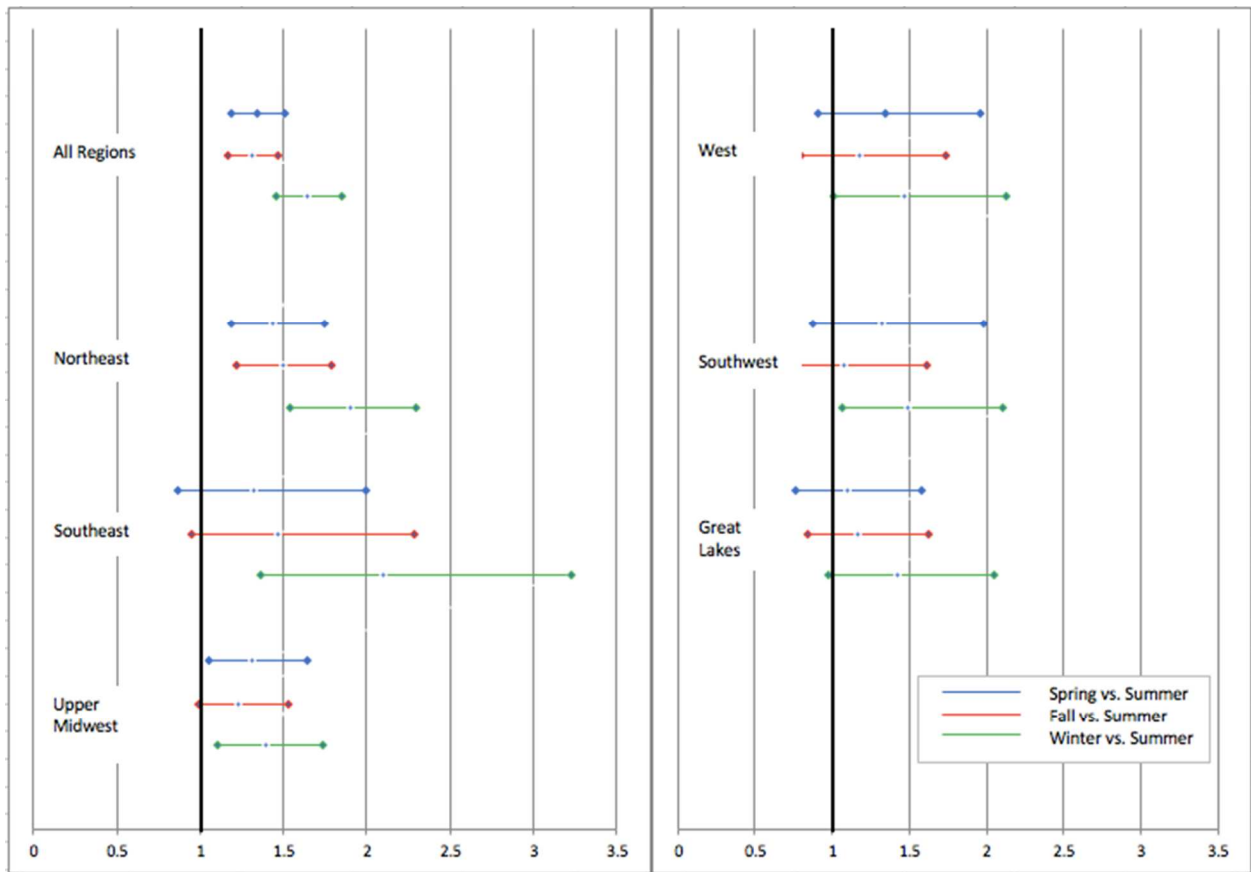

Figure S3. Percentage of moderate to very severe exacerbations in each season.

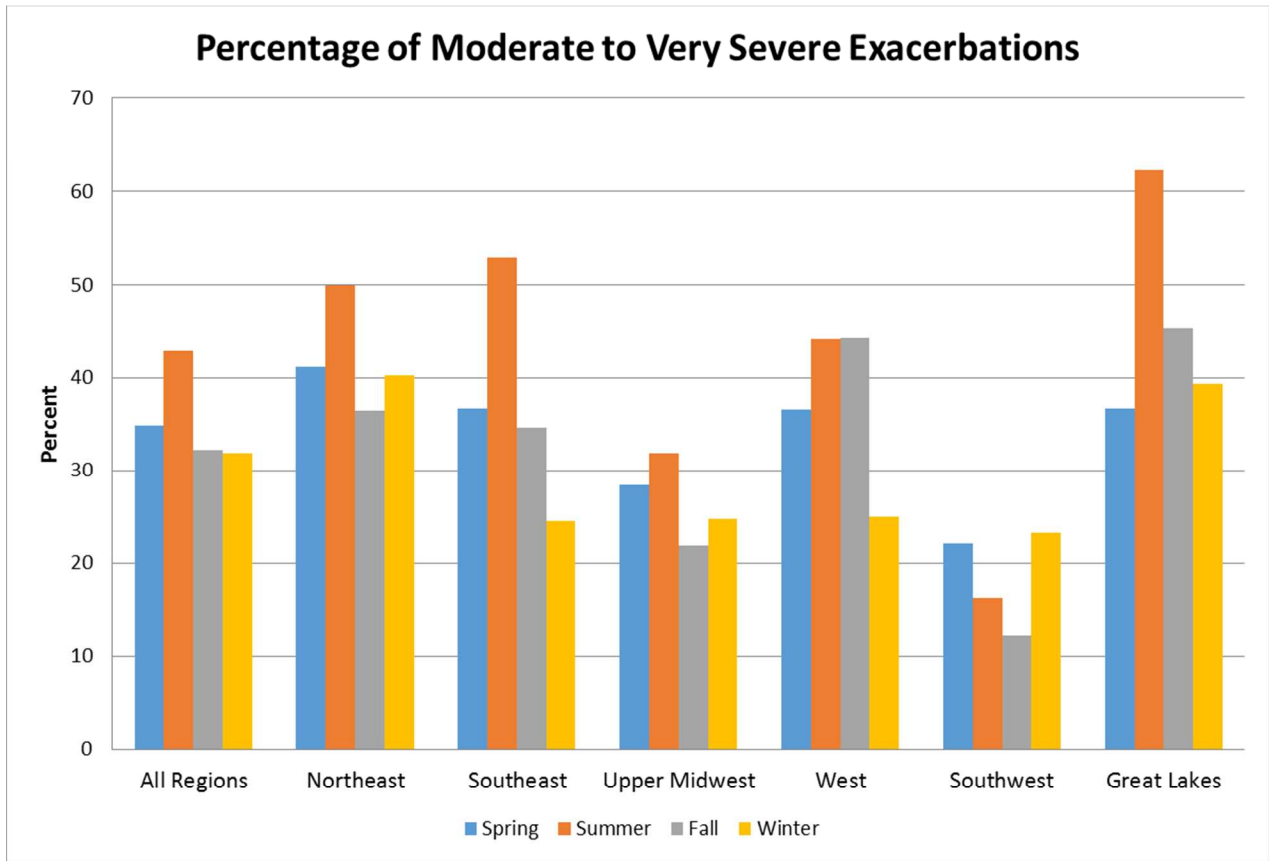

Figure S4. Percent distribution of death in each season.

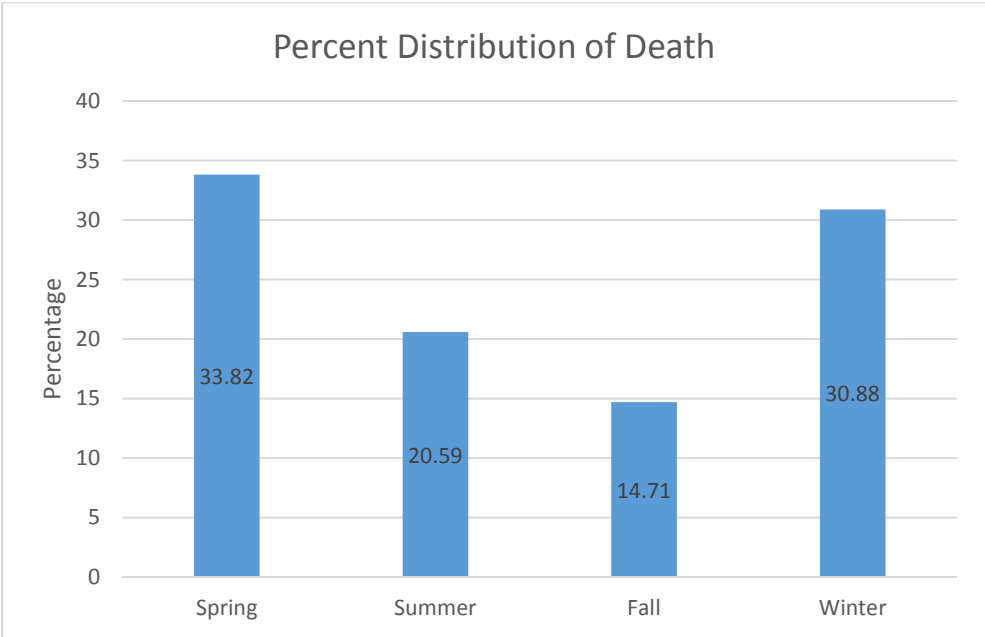

Figure S5: Relationship between percent of positive flu test and exacerbation rates in the United States.

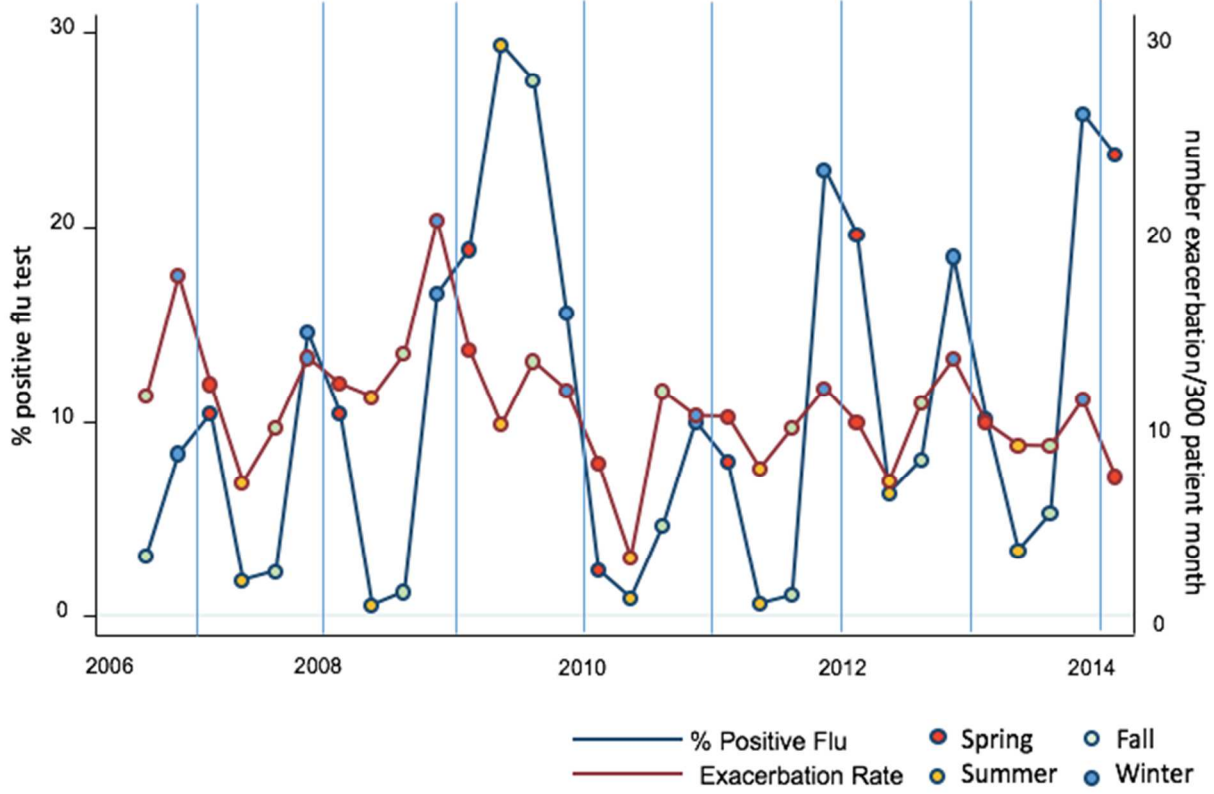

Supplement: AnnalsATS.201801-070OC_so_data_supplement.pdf [file AnnalsATS.201801-070OC_so_data_supplement.pdf]
